# Supplementary material for: A combined treatment with selective androgen and estrogen receptor modulators prevents bone loss in orchiectomized rats
Source: PubMed Central journal article supplement (PMC9646546; doi:10.1007/s40618-022-01865-9), 2022-07-22
Supplement: 40618_2022_1865_MOESM1_ESM.pdf [file 40618_2022_1865_MOESM1_ESM.pdf]

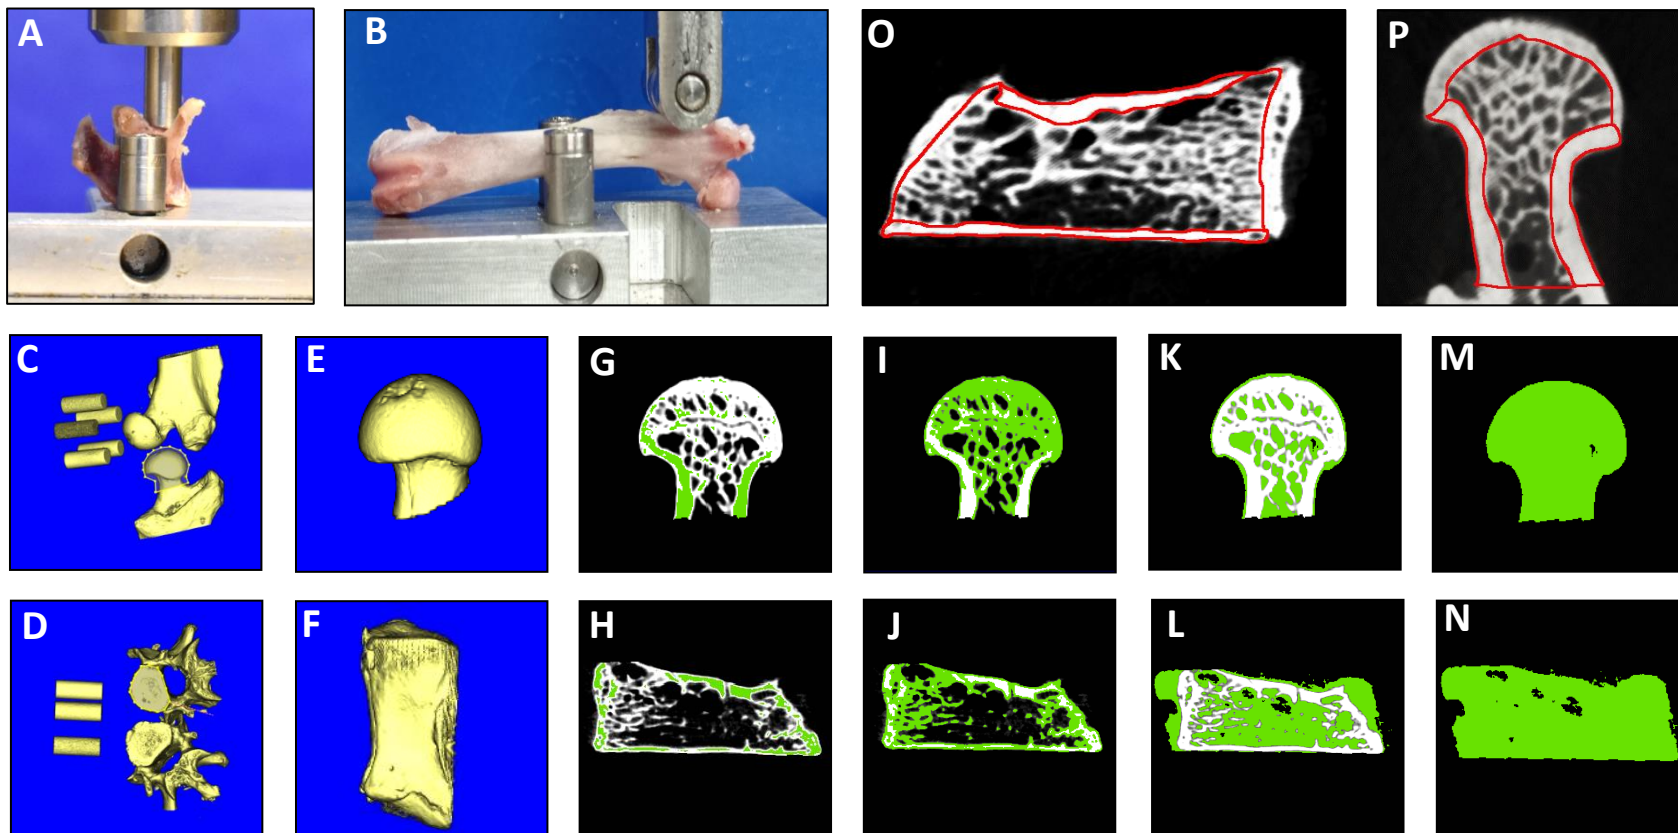

**Supplementary Figure 1.** (A, B) Biomechanical test of L4 and left femur; (C-N) micro-CT 3D analysis of femora and L4; (O, P) 2D-analysis of L4 and femur images.

(C, D) scans of femur, L4 and 5 phantoms; (E, F) femoral head and corpus vertebra of L4; (G, H) thresholds for cortical bone: femur 1.1 and L4 0.9  $\text{g}/\text{cm}^3$  to the highest measured threshold; (I, J) for trabecular bone: femur 0.5 to 1.1 and L4 0.4 to 0.9  $\text{g}/\text{cm}^3$ ; (K, L) for soft tissue: femur -0.1 to 0.5 and L4 -0.1 to 0.4  $\text{mg}/\text{cm}^3$ ; (M, N) for total tissue: femur and L4 -0.1 to the highest threshold; (O, P) red bounded regions: cortical and trabecular bone.
